1 **High-Throughput Sequencing of Transposable Elements Insertions**  
2 **Provides Evidence for Adaptive Evolution of the Invasive Asian Tiger**  
3 **Mosquito Towards Temperate Environments**

4 Clément Goubert<sup>1</sup>, Hélène Henri<sup>1</sup>, Guillaume Minard<sup>2,3</sup>, Claire Valiente Moro<sup>2</sup>, Patrick  
5 Mavingui<sup>2,4</sup>, Cristina Vieira<sup>1</sup> and Matthieu Boulesteix<sup>1</sup>

6 <sup>1</sup>Université de Lyon, F-69622, Lyon, France; Université Claude Bernard Lyon 1, CNRS,  
7 Laboratoire de Biométrie et Biologie Evolutive, UMR5558, F-69100 Villeurbanne, France

8 <sup>2</sup>Université de Lyon, F-69622, Lyon, France; Université Lyon 1, Villeurbanne, France;  
9 CNRS, UMR 5557, Ecologie Microbienne, Villeurbanne, France; INRA, UMR 1418,  
10 Villeurbanne, France

11 <sup>3</sup>Metapopulation Research Center, Department of Biosciences, University of Helsinki,  
12 Helsinki, Finland

13 <sup>4</sup>Université de La Réunion, UMR PIMIT, INSERM 1187, CNRS 9192, IRD 249,  
14 Plateforme Technologique CYROI, Sainte-Clotilde, La Réunion.

15 **Keywords:** Invasive species, *Aedes albopictus*, local adaptation, genome scan,  
16 Transposable Elements, diapause

17 **Corresponding author:** Matthieu Boulesteix, Université de Lyon, F-69622, Lyon,  
18 France; Université Claude Bernard Lyon 1, CNRS, Laboratoire de Biométrie et Biologie  
19 Evolutive, UMR5558, F-69100 Villeurbanne, France; phone: +334 72 43 29 16, fax:

20 +334 72 43 13 88; email: [matthieu.boulesteix@univ-lyon1.fr](mailto:matthieu.boulesteix@univ-lyon1.fr)

21 **Running title:** Molecular adaptation in *Ae. albopictus*

## 22 **Abstract**

23 Invasive species represent unique opportunities to evaluate the role of local  
24 adaptation during colonization of new environments. Among these, the Asian  
25 tiger mosquito, *Aedes albopictus*, is a threatening vector of several human viral  
26 diseases, including dengue, chikungunya and the emerging Zika fevers. Its broad  
27 presence in both temperate and tropical environments has sometimes been  
28 considered as the reflect of a great "ecological plasticity". However, no study has  
29 been conducted to assess the role of adaptive evolution in the ecological success  
30 of *Ae. albopictus* at the molecular level. In the present study we performed a  
31 genomic scan to search for potential signatures of selection leading to local  
32 adaptation in a hundred of field collected mosquitoes from native populations of  
33 Vietnam and temperate invasive populations of Europe. High throughput  
34 genotyping of transposable element insertions generated more than 120 000  
35 polymorphic loci, which in their great majority revealed a virtual absence of  
36 structure between bio-geographic areas. Nevertheless, 92 outlier loci show a high  
37 level of differentiation between temperate and tropical populations. The majority  
38 of these loci segregates at high insertion frequencies among European  
39 populations, indicating that this pattern could have been caused by recent events  
40 of adaptive evolution in temperate areas. Six outliers were located near putative  
41 diapause effector genes, suggesting fine-tuning of this critical pathway during

42 local adaptation.

## 43 **Introduction**

44 Biological invasions represent unique opportunities to study fast evolutionary changes  
45 such as adaptive evolution. Indeed, settlement in a novel area represents a biological  
46 challenge that invasive species have successfully overcome. The underlying processes  
47 could be studied at the molecular level, particularly to gather empirical knowledge about  
48 the genetics of invasions, a field of study that has produced extensive theoretical  
49 predictions, but for which there is still little evidence in nature (Colautti & Lau 2015).  
50 Some of the main concerns are to disentangle the effects of neutral processes during  
51 colonization, such as founder events or allele surfing at the migration front, from  
52 adaptive evolution (i.e. local adaptation, Lande 2015; Peischl & Excoffier 2015; Colautti  
53 & Lau 2015).

54 Adaptation can arise either through the appearance and spread of a new beneficial  
55 mutation, the spread of a favorable allele from standing genetic variation, or from  
56 hybridization in the introduction area (Handley *et al.* 2011; Colautti & Lau 2015; Bock *et*  
57 *al.* 2015). Detection of the footprint of natural selection is however dependent on the  
58 availability of informative genetic markers, which should provide a substantial coverage  
59 of the genome to allow selection scans and be easily and confidently scored across  
60 many individuals. Unfortunately, invasive organisms are rarely model species, making  
61 the development of a reliable and efficient marker challenging.

62 The Asian tiger mosquito, *Aedes (Stegomyia) albopictus* (Diptera:Culicidae) is currently  
63 one of the most threatening invasive species (Invasive Species Specialist Group).

64 Originating from South-Eastern Asia, this species is one of the primary vectors of  
65 Dengue and Chikungunya viruses, and is also involved in the transmission of other  
66 threatening arboviruses (Paupy *et al.* 2009), in particular the newly emerging Zika virus  
67 (Grard *et al.* 2014; Marcondes & Ximenes 2015; Chouin-Carneiro *et al.* 2016). *Ae.*  
68 *albopictus* has now settled in every continent except Antarctica, and is found both under  
69 tropical and temperate climates (Bonizzoni *et al.* 2013). While this species is supposed  
70 to originate from rain forests of South-Eastern Asia (Hawley 1988), the native area of  
71 *Ae. albopictus* encompasses contrasted environments including temperate regions of  
72 Japan and China, offering a large potential of fit towards newly colonized environments.  
73 For example, the induction of photoperiodic diapause in temperate areas, that has a  
74 genetic basis in *Ae. albopictus* (Hawley *et al.* 1987; Hanson & Craig 1994; Urbanski *et*  
75 *al.* 2010), is decisive to ensure invasive success in Europe or Northern America. Indeed  
76 it allows the susceptible populations to survive through winter at the larval stage into the  
77 eggs. Such a trait appears governed by a “genetic toolkit” involving numerous genes  
78 and metabolic networks, for which however the genetic polymorphism between  
79 diapausing and non-diapausing strains remains to be elucidated (Poelchau *et al.*  
80 2013b). In addition, the colonization of new areas that look similar at first glance can still  
81 involve *de novo* adaptation: indeed, even environment sharing climatic variables are not  
82 necessarily similar regarding edaphic and biotic interactions (Colautti & Lau 2015).  
83 Hence, this suggests that whatever are the native and settled environments, it might be  
84 possible to find evidence of adaptive evolution in invasive populations of *Ae. albopictus*.  
85 To better understand the invasive success of this species, we genotyped 140 field

86 individuals, collected from three Vietnamese (native tropical area) and five European  
87 (invasive temperate area) populations, aiming to identify genomic regions involved in  
88 local adaptation. To do so, we developed new genetic markers, based on high  
89 throughput genotyping of the insertion of Transposable Elements (TEs) that represent at  
90 least one third of the genome of *Ae. albopictus* and include recently active families that  
91 could reach thousands of copies in one genome (Goubert *et al.* 2015).

92 Amplification of TE insertions is particularly efficient to obtain a large number of genetic  
93 markers throughout one genome (Bonin *et al.* 2008), especially if few genomic  
94 resources are available (Monden *et al.* 2014), which was case until recently for the  
95 Asian tiger mosquito. In addition, such markers represent a seducing alternative to other  
96 methods of diversity reduction, such as RAD-sequencing (Miller *et al.* 2007), that could  
97 be less efficient in species with high TE load (Davey *et al.* 2012) and did not produce  
98 satisfying results in *Ae. albopictus* (Goubert *et al.* 2016). In mosquitoes, TEs have been  
99 shown to be powerful markers both for population structure analysis (Biedler *et al.* 2003;  
100 Boulesteix *et al.* 2007; Santolamazza *et al.* 2008; Esnault *et al.* 2008) and genome  
101 scans (Bonin *et al.* 2009). We hypothesized that some TE insertion sites could be  
102 located at the neighborhood of targets of natural selection and thus could reach high  
103 level of differentiation between native and invasive populations if selective sweeps  
104 occurred during local adaptation. In addition, some TEs could also insert near or inside  
105 coding regions and thus could be directly involved in environmental adaptation  
106 (Casacuberta & González 2013), eventually contributing to the success of invasive  
107 species (Stapley *et al.* 2015).

108 To distinguish between neutral demographic effects and adaptive evolution, we first  
109 performed population genetic analyses to reveal the global genetic structure of the  
110 studied populations. We then performed a genomic scan for selection and identified 92  
111 candidate loci under directional selection, among which several can be located in the  
112 neighborhood of diapause related genes.

## 113 **Material and Methods**

### 114 **Biological samples**

115 A total number of 140 flying adult females *Ae. albopictus* were collected in the field at  
116 eight sampling sites in Europe and Vietnam during the summers of 2012 and 2013  
117 (Figure 1 and Table S1). Individuals were either sampled using a single trap or using  
118 aspirators through the sampling site within a 50 meters radius. When traps were used,  
119 live mosquitoes were collected after a maximum of two days.

### 120 **High throughput Transposon Display (TD) genotyping.**

121 Insertion polymorphism of five transposable elements families: I Loner Ele1 (IL1), Loa  
122 Ele2B (L2B), RTE4, RTE5 and Lian 1 identified by Goubert *et al.* (2015) in *Ae.*  
123 *albopictus* was characterized using Transposon Display (TD), a TE insertion specific  
124 PCR method, combined with Illumina sequencing of all TD amplification products  
125 (Figure S1). These TE families were chosen according to their high estimate of copy  
126 number (from 513 to 4203 copies), high identity between copies, and a “copy and paste”  
127 mode of transposition (all these TEs are non-LTR Class I retrotransposons).



128 **DNA Extraction and TD adapter ligation.** Total DNA was extracted from whole adult  
129 bodies following the Phenol-Chloroform protocol described by Minard *et al.* (2015). TD  
130 was then set up combining methods from previous studies (Munroe *et al.* 1994; Roy *et*  
131 *al.* 1999; Akkouche *et al.* 2012; Carnelossi *et al.* 2014). First, individual extracted DNA  
132 ( $\approx 75\text{ng}$ ) was used for enzymatic digestion in a total volume of  $20\ \mu\text{L}$ , with HindIII  
133 enzyme ( $10\text{U}/\mu\text{L}$ ) and buffer R (Thermo Scientific) for 3 hours at  $37\text{C}$ . The enzyme was  
134 inactivated at  $80\text{C}$  for 20 minutes. TD adapters were then build hybridizing Hindlink with  
135 MSEB oligonucleotides ( $100\mu\text{M}$ , see Table S2) in  $20\text{X}$  SSC and  $1\text{M}$  Tris in a total  
136 volume of  $333\mu\text{L}$  after 5mn of initial denaturation at  $92\text{C}$  and 1h at room temperature for  
137 hybridization of the two parts. Once ready, TD adapters were then ligated to  $20\ \mu\text{L}$  of the  
138 digested DNA mixing  $2\mu\text{L}$  of TD adapter with  $10\text{U}$  T4 ligase and  $5\text{X}$  buffer (Fermentas)  
139 in a final volume of  $50\mu\text{L}$  for 3 hours at  $23\text{C}$ .

140

141 **Library construction.** For each individual, and for each of the five TE families, TE  
142 insertions were amplified by PCR (PCR 1) in a Biorad Thermal Cycler (either C1000 or  
143 S1000), in a final volume of  $25\mu\text{L}$ . Mixture contained  $2\mu\text{L}$  of digested-ligated DNA with  
144  $1\mu\text{L}$  dNTPs ( $10\text{mM}$ ),  $0.5\mu\text{L}$  TD-adapter specific primer (LNP,  $10\mu\text{M}$ , see S3 Table) and  
145  $0.5\ \mu\text{L}$  of TE specific primer ( $10\mu\text{M}$ ),  $1\text{U}$  AccuTaq polymerase ( $5\text{U}/\mu\text{L}$ ) with  $10\text{X}$  buffer  
146 and Dimethyl-Sulfoxyde (Sigma). Amplification was performed as follows: denaturation  
147 at  $98\text{C}$  for 30 seconds then 30 cycles including  $94\text{C}$  for 15 seconds, hybridization at  $60\text{C}$   
148 for 20 seconds and elongation at  $68\text{C}$  for 1 minute; final elongation was performed for 5  
149 minutes at  $68\text{C}$ . For L2B and RTE5 TEs, a nested PCR was performed in order to

150 increase specificity in the same PCR conditions using internal forward TE primers and  
151 LNP (Table S2). PCR 1 primers include a shared tag sequence that was used for  
152 hybridization of the individual indexes by PCR 2.

153 For each TE, three independent PCR 1 were performed from the same digestion  
154 product. PCR 1 products (3 PCR \* 5 TE per individual) were then purified using volume-  
155 to-volume Agencout AMPure XP beads (20 $\mu$ L PCR 1 + 20 $\mu$ L beads) and eluted in 30 $\mu$ L  
156 Resuspension buffer. After nanodrop quantification, equimolar pools containing the 3\*5  
157 PCR products per individual were made using Tecan EVO200 robot. Individual pools  
158 were then size selected for fragment ranging from 300 to 600 bp using Agencout  
159 AMPure XP beads as follow: first magnetic beads were diluted in H<sub>2</sub>O with a ratio of  
160 1:0.68 then add to 0.625 X PCR products in order to exclude long fragments. A second  
161 purification was performed using a non-diluted bead: DNA ratio of 1:8.3 to exclude small  
162 fragments.

163 Samples' multiplexing was performed using home made 6 bp index (included in SRA  
164 individual name), which were added to the R primer (Table S2) during a second PCR  
165 (PCR 2) with 12 cycles in ABI 2720 Thermal Cycler. Mixture contained 15ng PCR  
166 products, 1 $\mu$ L of dNTPs (10mM), 0.5 $\mu$ L MTP Taq DNA Polymerase (5U/ $\mu$ L, Sigma), 5 $\mu$ L  
167 10X MTP Taq Buffer and 1.25 $\mu$ L of each tagged-primer (20 $\mu$ M) in a final volume of 50 $\mu$ L.  
168 Amplification was performed as follows: denaturation at 94C for 60 seconds then 12  
169 cycles including denaturation at 94C for 60 seconds, hybridization at 65C for 60 seconds  
170 and elongation at 72C for 60 seconds; final elongation was performed for 10 minutes at  
171 72C. PCR 2 products were purified using Agencout AMPure XP beads: DNA ratio of

172 1:1.25 to obtain libraries. Finally, TD products were paired-end sequenced on an  
173 Illumina HiSeq 2000 (1 lane) at the GeT-PlaGe core facility (Genome and  
174 Transcriptome, Toulouse) using TruSeq PE Cluster Kit v3 (2x100 bp) and TruSeq SBS  
175 Kit v3.

#### 176 **Bioinformatic treatment of TD sequencing.**

177 The different steps of the informatics treatment from the raw sequencing dataset to  
178 population binary matrices for presence/absence of TE insertions per individual are  
179 described in Figure S2. First, the paired-end reads of each individual were quality  
180 checked and trimmed using UrQt v. 1.0.17 (Modolo & Lerat 2015) with standard  
181 parameters and a *t* quality threshold of 10. Reads pairs were then checked and trimmed  
182 for Illumina adapter contamination using cutadapt (Martin 2011). Specific amplification of  
183 TE insertions was controlled by checking for the expected 3' TE sequence on the R1  
184 read using Blat (Altschul *et al.* 1990) with an identity threshold of 0.90. Only reads with  
185 an alignment-length/read-length ratio  $\geq 0.90$  were then retained. R2 reads for which  
186 the R1 mate passed this filter were then selected for the insertion loci construction, after  
187 the removal of the TD adapter on the 5' start using cutadapt and the removal of reads  
188 under 30 bp. Selected reads were separated in each individual according to the TE  
189 families for loci construction.

190 In order to correct the inter-individual coverage variations, we performed a sampling of  
191 the cleaned reads. First, for each TE family, distribution of the number of read per  
192 individual was drawn, and individuals with less reads than the first decile of this  
193 distribution were removed; then cleaned reads of the remaining individuals were

194 randomly sampled at the value of the first decile of coverage (this value varies among  
195 TE families). For each TE, the sampled reads of each retained individual were clustered  
196 together using the CD-HIT-EST program (Li & Godzik 2006) to recover insertion loci.  
197 During this all-to-all reads comparison, the alignments must had a minimum of 90  
198 percent identity, and the shortest sequence should be 95% length of the longest, global  
199 identity was used and each read was assigned at its best cluster (instead of the first that  
200 meet the threshold). In a second step, the reference reads of each locus within  
201 individual, given by CD-HIT-EST, were clustered with all the reference reads of all  
202 individuals, using the same threshold, in order to build the locus catalog including list of  
203 loci of all individuals and the coverage for each locus in each individual. After this step,  
204 insertion loci that matched known repeats of the Asian tiger mosquito (Goubert *et al.*  
205 2015) were discarded; alignments were performed with Blastn using default parameters.  
206 Since the quality control removed a substantial number of reads for the construction of  
207 TE insertions catalog, the raw R2 reads (with their TD adapter removed), that could  
208 have been discarded in a first attempt were then mapped over the catalog in order to  
209 increase the scoring sensibility. Before mapping, the raw R2 reads were also sampled at  
210 the first decile of individual coverage (as described previously). At this step, individuals  
211 that have been removed from at least two TE families for loci construction were  
212 definitively removed from the whole analysis. Mapping was performed over all insertion  
213 loci of all TE families in a single run in order to prevent multiple hits. Blat was used with  
214 an identity threshold of 90 percent. Visual inspection of alignment quality over 30  
215 sampled loci per TE family was performed in order to ensure the quality of scoring.

216 In order to check if the sampling procedure would affect our results, the read sampling  
217 procedures and subsequent analysis were performed independently 3 times (replicates  
218 M1, M2 and M3).

219

## 220 **Genetic analyses and Genomic scan.**

221 Population structure analyses were performed independently for each TE family.  
222 Principal Coordinate Analysis (PCoAs) were performed to identify genetic clusters using  
223 the ade4 package (Dray & Dufour 2007) of R 3.2.1 (R development core team 2015). S7  
224 coefficient of Gower and Legendre was used as a genetic distance since it gives more  
225 weight to shared insertions. Shared absences were not used because they do not give  
226 information about the genetic distance between individuals. Pairwise populations  $F_{ST}$   
227 were computed using Arlequin 3.5 (Excoffier & Lischer 2010); significance of the index  
228 was assessed over 1,000 permutations using a significance threshold of 0.05.

229 The genomic scan was performed in two steps for each of the sampling replicates of  
230 each TE. First, Bayescan 2.1 (Foll & Gaggiotti 2008) was used to test for each locus  
231 deviation from neutrality. Bayescan consider a fission/island model where all  
232 subpopulations derive from a unique ancestral population. In this model, variance in  
233 allele frequencies between subpopulations is expected to be due either to the genetic  
234 drift that occurred independently in each subpopulation or to selection that is a locus-  
235 specific parameter. The differentiation at each locus in each subpopulation from the  
236 ancestral population is thus decomposed into a  $\beta$  component (shared by all loci in a

237 subpopulation) and is related to genetic drift, and a  $\alpha$  component (shared for a locus by  
238 all subpopulations) due to selection. Using a Bayesian framework, Bayescan tests for  
239 each locus the significance of the  $\alpha$  component. Rejection of the neutral model at one  
240 locus is done using posterior Bayesian probabilities and controlled for multiple testing  
241 using false discovery rate. In addition, Bayescan manage uncertainty about allele  
242 frequency from dominant data such as the TD polymorphism, leaving the  $F_{IS}$  to freely  
243 vary during the estimation of parameters. Bayescan was used with default values except  
244 for the prior odds that were set to 100 (more compatible with datasets with a large  
245 number of loci, see Bayescan manual), and a significance  $q$ -value threshold of 0.05 was  
246 used to retain outlier loci. In a second step, only outliers suggesting divergent directional  
247 selection between, Europe and Vietnam were considered. To identify them, locus-by-  
248 locus Analyses of Molecular Variance (AMOVAs) were performed using Arlequin 3.5 for  
249 each TE family. Significance of the  $F_{CT}$  (inter group differentiation) between Vietnamese  
250 and European populations was assessed performing 10,000 permutations with a  
251 significance threshold of 0.05. For each dataset, Bayescan outliers were crossed with  
252 significant  $F_{CT}$  loci to retain candidate loci.

253 To identify the genomic environment of the candidate loci, the outlier sequences  
254 (reference R2 read) were mapped onto the assembled genome of *Ae. albopictus* (Chen  
255 *et al.* 2015) using Blastn. Blastn alignments were performed with default parameters and  
256 sorted according to alignment score and after visual inspection of each alignment.  
257 Outlier loci with multiple identical hits were discarded. To identify genes surrounding the  
258 mapped outliers, the complete transcriptome of *Ae. albopictus* (including eggs, larvae  
259 and adult females, downloaded at [www.albopictusexpression.org](http://www.albopictusexpression.org) Armbruster *et al.*) was

260 mapped over the reference genome using blat with default parameters; after alignment,  
261 one best hit was retained per transcript according to the best alignment score. When a  
262 transcript had multiple best hits, all positions for the transcript were considered.

263

#### 264 **PCR validation and Outlier analyses.**

265 Pairs of primers were designed for each outlier locus in order to be used in standardized  
266 conditions. Forward primer was located in the TE end of the concerned family and  
267 reverse primer was set from the outlier locus (pairs of primers which successfully  
268 amplified insertions are provided in Table S2). All primer pairs were first tested on a set  
269 of 10 individuals in order to assess their specificity using 1/50 dilution of starting DNA  
270 from the TD experiment. Validated primers were then used to check the insertions  
271 polymorphism in 47 representative individuals from the 8 populations studied in the TD  
272 experiment using 1/50 dilutions of the starting DNA (not all individuals could be used  
273 because of DNA limitations). All PCRs were conducted in a final volume of 25 $\mu$ L using  
274 0.5 $\mu$ L of diluted DNA, 0.5 $\mu$ L of each primer (10 $\mu$ M), 1 $\mu$ L of dNTPs (10mM) and 1U of  
275 DreamTaq Polymerase with 1X green buffer (ThermoFisher Scientific). Amplification  
276 was performed as follows: denaturation at 94C for 2 minutes then 34 cycles including  
277 denaturation at 94C for 30 seconds, hybridization at 60C for 45 seconds and elongation  
278 at 72C for 45 seconds; final elongation was performed for 10 minutes at 72C. After 45  
279 minutes migration of the PCR product on 1X electrophoresis agarose gel, CG and MB  
280 assessed insertion polymorphism independently.

## 281 **Results**

### 282 **High throughput TE insertion genotyping.**

283 Sequencing produced a total of 102,319,300 paired-end reads (2x101bp). After quality  
284 and specificity filtering 24,332,715 reads were suitable for analyses. On average, a total  
285 number of 128,491 polymorphic insertion loci were available for each of the three  
286 sampling replicates. The mean number of loci per individual and per TE family ranged  
287 from  $1025 \pm 290$  s.d. (IL1 family, mean and s.d. averaged over the three replicates) to  
288  $3266 \pm 766$  s.d. (RTE5 family). Details are given in Table S1. While our read sampling  
289 procedure could have artificially lowered the mean insertion frequency of the loci, this  
290 effect should be small because in our final datasets, the TE insertion frequencies (*i. e.*  
291 the number of individuals that share an insertion) are not correlated with the mean  
292 number of read per individual at the considered locus (Figure S3).

293

### 294 **Population structure.**

295 Principal Coordinate Analyses (PcoAs) were performed independently for each of the  
296 five TEs (Figure 2). Among the three main Principal Coordinates (PCs), individuals tend  
297 to be grouped according to their respective populations with little overlap between  
298 groups. However, the three main PCs represent only a small fraction of the total  
299 variance (< 10%), suggesting a weak genetic structuring between the populations.  
300 Overall, individuals from Vietnamese populations (HCM, TA, VT) tend to be grouped



301 together in a single cluster, at the exception of 13 to 14 individuals from HCM when  
302 using L2B and RTE5 TE families (S2 Figure), along with six individuals of VT with the  
303 RTE4 TE family (Figure 1) that can not be clearly distinguished from European samples.  
304 BCN individuals (Spain) represent the most homogeneous group, well differentiated  
305 from Vietnamese and French individuals (SP, CGN, NCE and PLV).  
306 In agreement with PCoAs, Analyses of Molecular Variance (AMOVAs) attributed very  
307 few genetic variances among groups (Vietnam-Europe) and between populations within  
308 groups (Table 1). In the studied populations, most of the genetic variance was  
309 distributed among individuals within groups.

310 Measures of genetic differentiation among pairs of populations were consistent with  
311 PCoAs and AMOVAs (File S1): the BCN population shows the highest  $F_{ST}$  values with  
312 the other populations for each of the five TEs ( $0.051 < F_{ST} < 0.148$ ), while Vietnamese  
313 populations were the most closely related ( $0.011 < F_{ST} < 0.032$ ). While VT is located  
314 100 km away from TA and HCM (both sampled in the same city, Hô Chi Minh, Vietnam)  
315 the  $F_{ST}$  values are very similar between the three Vietnamese populations, suggesting  
316 no influence of geography at this scale. CGN and NCE, sampled in the same urban area  
317 (Nice agglomeration), are also little or not significantly differentiated depending on the  
318 TE family. The previously identified intermediate pattern of HCM with some European  
319 populations at L2B and RTE5 loci (PCoAs analyses) is also found at the  $F_{ST}$  level,  
320 especially regarding the low differentiation with the PLV population for these markers  
321 ( $0.011 < F_{ST} < 0.020$ ).

322

323 **Genomic scan.**

324 Research of outlier loci for both selection signature using Bayescan (non-hierarchical  
325 island model), and for significant  $F_{CT}$  (between Europe-Vietnam group differentiation)  
326 identified 92 candidate insertion loci (Figure 3). Most of these insertions are found in  
327 both areas (no private allele), except for RTE4\_6 and RTE4\_7 that were not found in  
328 Vietnam. In addition, a majority of outliers corresponds to high frequency insertions in  
329 Europe, while the same trend is not observed at 92 randomly chosen loci among those  
330 having the same minimum insertion frequency ( $\geq 20$  individuals/locus) between Europe  
331 and Vietnam (Figure 4). PCR amplification of the outlier loci were carried out on a  
332 representative panel of 47 individuals to validate the insertion pattern detected by TD  
333 (see Material and Method). For loci where the amplification was successful, the insertion  
334 pattern observed by PCR always confirmed the results from TD (Figure S5).

335 From 92 outlier loci, 21 could be attributed to a unique position on the *Ae. albopictus*  
336 genome. Annotation and distance to surrounding genes are reported on S2 File. We  
337 found that six outliers (S2 File, sheet 3, highlighted) loci are located on contigs that  
338 harbor genes previously identified in *Ae. albopictus* as being differentially expressed  
339 between diapause-induced and non diapause-induced samples , and for which  
340 orthologs in *Drosophila melanogaster* are known to be part of well-identified functional  
341 networks (Poelchau *et al.* 2013b). All these six loci are found to be outliers because of  
342 their high insertion frequencies in Europe compared with Vietnam.

## 343 **Discussion**

344 The goal of our study was to identify genomic regions involved in adaptive evolution of  
345 *Ae. albopictus* thanks to the development of new genetic markers. Through high-  
346 throughput genotyping of five TE families' insertion polymorphisms, we identified up to  
347 128,617 polymorphic loci among a hundred of individuals from eight sampling sites. The  
348 estimated genome size of *Ae. albopictus* exceeds one billion base-pairs (Goubert *et al.*  
349 2015; Dritsou *et al.* 2015; Chen *et al.* 2015). Accordingly, the amount of markers scored  
350 in this study offers a comfortable genomic density of one marker every 10 kb.

351 We provide here a new and cost efficient method to quickly generate a large amount of  
352 polymorphic markers without extensive knowledge about one species genome.

353 Specifically, this strategy appears extremely valuable for species with a large genome  
354 size, where TE density could severely compromise the development of more classical  
355 approaches, such as the very popular RAD-sequencing.

356 The genetic structure of the studied populations showed strong consistency between  
357 sampling replicates of individuals' reads, demonstrating the robustness of the method in  
358 spite of an initial substantial coverage variation among individuals. Population genetics  
359 analyses revealed a very low level of genetic structuring between European and  
360 Vietnamese populations. Among the studied populations, AMOVAs showed that most of  
361 the genetic variation is distributed between individuals within populations (> 90%), and  
362 as suggested by pairwise  $F_{ST}$  and PCoAs, only a small part (< 10%) of the genetic  
363 variance is due to differentiation between populations. The genetic differentiation we

364 measured is indeed as high among European populations as it is between populations  
365 from Europe and Vietnam.

366 This singular population structure is in agreement with previous results gathered in *Ae.*  
367 *albopictus* using different collections of allozymes, mtDNA or microsatellites markers  
368 (Black *et al.* 1988; Kambhampati *et al.* 1991; Zhong *et al.* 2013; Gupta & Preet 2014;  
369 Manni *et al.* 2015). Moreover, a recent analysis performed with a set of 11  
370 microsatellites on individuals from the same populations (at the exception of BCN)  
371 showed a similar distribution of genetic variation among hierarchical levels (Minard *et al.*  
372 2015). These results demonstrate the reliability of our markers and confirm that a non-  
373 hierarchical island model can likely fit the global genetic structure. The genetic diversity  
374 observed in Europe is compatible with a scenario of multiple and independent  
375 introductions, as already suggested for *Ae. albopictus* (Urbanelli *et al.* 2000; Birungi &  
376 Munstermann 2002; Takumi *et al.* 2009; Becker *et al.* 2013). However, as previously  
377 suggested, this pattern could also be the result of founder events that may occur during  
378 colonization and/or a restriction of gene flow between populations consecutive to their  
379 introduction. Answering such a question would require an extended sampling all over  
380 the native area.

381 Outlier analysis revealed 92 loci with high posterior probabilities of being under positive  
382 selection between European and Vietnamese populations. When possible, the PCR  
383 amplification of the outlier loci, using a set of representative individuals, always  
384 confirmed a shift of insertion frequencies toward either the European or the Vietnamese  
385 sampling sites. This suggests that in spite of a reduced coverage, introduced by

386 sampling in the dataset, the scored insertion polymorphisms are reliable. In addition, our  
387 method of analysis is likely to be conservative: the Bayescan outliers were selected for  
388 their consistency with a significant  $F_{CT}$  between European temperate and Vietnamese  
389 tropical populations, which avoid retaining outliers that we were not looking for, for  
390 example those due to a population specific event.

391 We were able to assign a unique position for 21 of the outlier loci on the *Ae. albopictus*  
392 genome. As expected by the *Ae. albopictus* genomic composition (Goubert *et al.* 2015;  
393 Dritsou *et al.* 2015; Chen *et al.* 2015), an important part of the other outlier loci were  
394 located in repeated regions (44,6% of total), despite our efforts to remove *a priori* loci  
395 occurring in known transposable elements. Since the *Ae. albopictus* genome publication  
396 is very recent, no gene set or other genome annotation are currently available. We thus  
397 took advantage of the *Ae. albopictus* transcriptome data (Poelchau *et al.* 2013a) to  
398 annotate regions surrounding the detected outliers. We found six outliers located in  
399 contigs which also harbor genes differentially expressed between individuals induced for  
400 diapause and controls (Poelchau *et al.* 2013b), two of them, being located either in an  
401 intron (RTE4\_7442) or within 3kb (RTE4\_17015) of these candidate genes. It is worth  
402 mentioning that these two genes belong to the same functional group (GO:0005576  
403 extracellular region). Diapause is a critical developmental stage found only in temperate  
404 populations of the Asian tiger mosquito. Interestingly, this functional pathway has been  
405 shown to benefit from fast adjustments thanks to local adaptation. For instance,  
406 Urbanski *et al.* (2012) showed that invasive American populations originating from  
407 Japan have rapidly evolved a new adaptive clinal response to diapause induction,

408 independent from that observed in the native area. Thus, adaption in the temperate  
409 regions could have led to several selective sweeps on gene or regulatory sequences  
410 involved in this critical pathway, allowing the settlement of the mosquito in new  
411 temperate areas.

412 Interestingly, and as it is the case for these six outliers, we found significantly more  
413 outlier loci with a high frequency in Europe and low frequency in Vietnam than the  
414 opposite pattern. This was unexpected regarding our initial assumptions: a favored allele  
415 selected in one or another environment has *a priori* no reason to be more often  
416 associated with the presence or the absence of a TE insertion at linked sites. However,  
417 we found that the majority of the sequenced TE insertions segregates at low frequencies  
418 (around 10% of all individuals). When considering the linked region of one polymorphic  
419 TE insertion, if a favorable mutation appears in an individual where the insertion is  
420 absent, the increase of frequency of this “absence” haplotype will thus, most of the time,  
421 have a modest effect on the genetic differentiation at this marker, since it is already  
422 segregating at high frequency. By contrast, if a favorable mutation appears in a TE  
423 “presence” haplotype, the increase in frequency of the linked TE insertion would lead to  
424 high differentiation ( $F_{CT}$ ) values. In absence of an alternative explanation, our outlier loci  
425 could thus indicate in which subset of populations the adaptive mutation occurred, and  
426 in the present case, this would have happened more frequently in the temperate  
427 populations.

428 Two scenarios, not mutually exclusive, could be invoked in the light of our data. A simple  
429 case would be a direct adaptive evolution in European invasive population that

430 originated from tropical regions of the native area. A second hypothesis, could be that  
431 invasive temperate populations came from Northernmost territories of the native area  
432 such as northern China or Japan where *Ae. albopictus* populations are already cold-  
433 adapted. It would be thus interesting to know whether the observed signature of  
434 selection results from more “ancient” adaptations in the native area, or if it originates  
435 from more recent fine tuning of cold-related traits in the invasive areas. A recent study  
436 (Porretta *et al.* 2012) suggested, using new variable *COI* mtDNA sequences and  
437 historical species range modeling, that Northern areas of the native range of *Ae.*  
438 *albopictus* would be the latest to have been colonized after a range expansion from  
439 Southern refugia following the last glacial around 21,000 years ago. The authors  
440 suggested that *Ae. albopictus* may have followed the human populations during their  
441 expansion from South to North in this area, that began approximately 15,000 years ago.  
442 Thus wherever the origin of the invasive individuals sampled in Europe, it is likely that  
443 they are representatives of populations that had recently undergone a shift of selective  
444 pressure from tropical to temperate climatic conditions. This could explain why so many  
445 outliers are associated with high insertion frequency in Europe, and that candidate  
446 genes in the diapause pathway are found in the neighborhood of some of these outliers.  
447 An easy way to distinguish between these possibilities would be to search if the same  
448 outlier insertions are present in several temperate populations from the native area.  
449 It is important to note that the results presented here are only restricted to a subset of  
450 the Asian tiger mosquito populations located in temperate and tropical environments. It  
451 is thus probable that some of the outliers detected could be specific to this particular

452 comparison and do not reflect the global pattern of differentiation between tropical and  
453 temperate populations. Research of the same outliers between other tropical and  
454 temperate populations from the native and non-native areas would be extremely  
455 valuable to extrapolate our results at a larger scale. Should the same outlier insertions  
456 be found at high frequencies in temperate locations – such as in USA, Japan or China –,  
457 extended investigations about the origin of invasive populations would help clarify if  
458 those similarities are due to an ancestral sweep or parallel sweeps that occurred  
459 independently in several populations. This study already provides for some candidate  
460 loci a set of functional primers that could be directly used to answer this question in any  
461 DNA sample of *Ae. albopictus*.

462 We report here the first leads supporting adaptive evolution at the molecular level in the  
463 Asian tiger mosquito. Progress in the annotation of published genomes, and the looming  
464 availability of supplementary genomic resources will allow gaining the most from these  
465 results. We hope that this work will contribute to unravel the implication of adaptive  
466 processes during the invasion of disease vectors.

467

## 468 **Acknowledgements**

469 We thank Van Tran-Van, Christophe Bellet, Grégory Lambert, Huynh Kim Ly Khanh and  
470 Trang Huynh who made possible and contributed to the samplings in France and  
471 Vietnam. We are grateful to Valèria Romero Soriano and her family for their help during  
472 sampling in Sant Cugat dèl Vallès. Library construction and sequencing was made in



473 collaboration with Clémence Genthon and Olivier Bouchez. We thank Manon Vigneron  
474 for PCR validation experiments. We also thank Rita Rebollo who provided insightful  
475 comments and English revision of the manuscript. This work was performed using the  
476 computing facilities of the CC LBBE/PRABI. C.G. received a grant from the French  
477 Ministry of Superior Education. This work was supported by the Centre National de la  
478 Recherche Scientifique, the Institut Universitaire de France, and preliminary  
479 experiments benefited from of grant of the Federation de Recherche 41 “Bio-  
480 Environnement et Santé”. Funding for mosquito sampling in Vietnam was provided by  
481 grants from EC2CO CNRS and occurred within the framework of GDRI “Biodiversity and  
482 Infectious Diseases in Southeast Asia”. Original maps used to describe sampling were  
483 freely downloaded from [http://d-maps.com/carte.php?num\\_car=4719&lang=en](http://d-maps.com/carte.php?num_car=4719&lang=en) and  
484 [http://d-maps.com/carte.php?num\\_car=708&lang=en](http://d-maps.com/carte.php?num_car=708&lang=en)

485

## 486 **References**

- 487  
488 Akkouche A, Rebollo R, Bulet N *et al.* (2012) tirant, a newly discovered active  
489 endogenous retrovirus in *Drosophila simulans*. *Journal of virology*, **86**, 3675–81.
- 490 Altschul SF, Gish W, Miller W, Myers EW, Lipman DJ (1990) Basic local alignment  
491 search tool. *Journal of molecular biology*, **215**, 403–10.
- 492 Becker N, Geier M, Balczun C *et al.* (2013) Repeated introduction of *Aedes albopictus*  
493 into Germany, July to October 2012. *Parasitology research*, **112**, 1787–90.
- 494 Biedler J, Qi Y, Holligan D *et al.* (2003) Transposable element (TE) display and rapid  
495 detection of TE insertion polymorphism in the *Anopheles gambiae* species complex.  
496 *Insect Molecular Biology*, **12**, 211–216.
- 497 Birungi J, Munstermann LE (2002) Genetic Structure of *Aedes albopictus* (Diptera:  
498 Culicidae) Populations Based on Mitochondrial ND5 Sequences: Evidence for an

- 499 Independent Invasion into Brazil and United States. *Annals of the Entomological*  
500 *Society of America*, **95**, 125–132.
- 501 Black WC, Ferrari JA, Sprengert D (1988) Breeding structure of a colonising species :  
502 *Aedes albopictus* ( Skuse ) in the United States. , **60**.
- 503 Bock DG, Caseys C, Cousens RD *et al.* (2015) What we still don't know about invasion  
504 genetics. *Molecular Ecology*, n/a–n/a.
- 505 Bonin A, Paris M, Després L *et al.* (2008) A MITE-based genotyping method to reveal  
506 hundreds of DNA polymorphisms in an animal genome after a few generations of  
507 artificial selection. *BMC genomics*, **9**, 459.
- 508 Bonin A, Paris M, Tetreau G, David J-P, Després L (2009) Candidate genes revealed by  
509 a genome scan for mosquito resistance to a bacterial insecticide: sequence and  
510 gene expression variations. *BMC genomics*, **10**, 551.
- 511 Bonizzoni M, Gasperi G, Chen X, James AA (2013) The invasive mosquito species  
512 *Aedes albopictus*: current knowledge and future perspectives. *Trends in*  
513 *parasitology*, **29**, 460–468.
- 514 Boulesteix M, Simard F, Antonio-Nkondjio C *et al.* (2007) Insertion polymorphism of  
515 transposable elements and population structure of *Anopheles gambiae* M and S  
516 molecular forms in Cameroon. *Molecular ecology*, **16**, 441–452.
- 517 Carnelossi EAG, Lerat E, Henri H *et al.* (2014) Specific activation of an I-like element in  
518 *Drosophila* interspecific hybrids. *Genome biology and evolution*, **6**, 1806–17.
- 519 Casacuberta E, González J (2013) The impact of transposable elements in  
520 environmental adaptation. *Molecular ecology*, 1503–1517.
- 521 Chen X-G, Jiang X, Gu J *et al.* (2015) Genome sequence of the Asian Tiger mosquito,  
522 *Aedes albopictus*, reveals insights into its biology, genetics, and evolution.  
523 *Proceedings of the National Academy of Sciences of the United States of America*,  
524 **112**, E5907–5915.
- 525 Chouin-Carneiro T, Vega-Rua A, Vazeille M *et al.* (2016) Differential Susceptibilities of  
526 *Aedes aegypti* and *Aedes albopictus* from the Americas to Zika Virus (MJ Turell,  
527 Ed.). *PLOS Neglected Tropical Diseases*, **10**, e0004543.
- 528 Colautti RI, Lau JA (2015) Contemporary evolution during invasion: evidence for  
529 differentiation, natural selection, and local adaptation. *Molecular Ecology*, **24**, 1999–  
530 2017.
- 531 Davey JW, Cezard T, Fuentes-Utrilla P *et al.* (2012) Special features of RAD  
532 Sequencing data: implications for genotyping. *Molecular ecology*.
- 533 Dray S, Dufour A-B (2007) The ade4 Package: Implementing the Duality Diagram for  
534 Ecologists. *Journal of Statistical Software*, **22**, 1–20.

- 535 Dritsou V, Topalis P, Windbichler N *et al.* (2015) A draft genome sequence of an  
536 invasive mosquito: an Italian *Aedes albopictus*. *Pathogens and global health*,  
537 2047773215Y0000000031.
- 538 Esnault C, Boulesteix M, Duchemin JB *et al.* (2008) High genetic differentiation between  
539 the M and S molecular forms of *Anopheles gambiae* in Africa. (P Awadalla, Ed.),  
540 *PloS one*, **3**, e1968.
- 541 Excoffier L, Lischer HEL (2010) Arlequin suite ver 3.5: a new series of programs to  
542 perform population genetics analyses under Linux and Windows. *Molecular ecology*  
543 *resources*, **10**, 564–7.
- 544 Foll M, Gaggiotti O (2008) A genome-scan method to identify selected loci appropriate  
545 for both dominant and codominant markers: a Bayesian perspective. *Genetics*, **180**,  
546 977–93.
- 547 Goubert C, Modolo L, Vieira C *et al.* (2015) De novo assembly and annotation of the  
548 Asian tiger mosquito (*Aedes albopictus*) repeatome with dnaPipeTE from raw  
549 genomic reads and comparative analysis with the yellow fever mosquito (*Aedes*  
550 *aegypti*). *Genome Biology and Evolution*, evv050–.
- 551 Goubert C, Minard G, Vieira C, Boulesteix M (2016) Population genetics of the Asian  
552 tiger mosquito *Aedes albopictus*, an invasive vector of human diseases. *Heredity*,  
553 10.1038/hdy.2016.35.
- 554 Grard G, Caron M, Mombo IM *et al.* (2014) Zika Virus in Gabon (Central Africa) – 2007:  
555 A New Threat from *Aedes albopictus*? (R Charrel, Ed.). *PLoS Neglected Tropical*  
556 *Diseases*, **8**, e2681.
- 557 Gupta S, Preet S (2014) Genetic differentiation of invasive *Aedes albopictus* by RAPD-  
558 PCR: Implications for effective vector control. *Parasitology Research*, **113**, 2137–  
559 2142.
- 560 Handley L-J, Estoup A, Evans DM *et al.* (2011) Ecological genetics of invasive alien  
561 species. *BioControl*, **56**, 409–428.
- 562 Hanson SM, Craig GB (1994) Cold Acclimation, Diapause, and Geographic Origin Affect  
563 Cold Hardiness in Eggs of *Aedes albopictus* (Diptera: Culicidae). *Journal of Medical*  
564 *Entomology*, **31**, 192–201.
- 565 Hawley WA (1988) The biology of *Aedes albopictus*. *Journal of the American Mosquito*  
566 *Control Association. Supplement*, **1**, 1–39.
- 567 Hawley W, Reiter P, Copeland R, Pumpuni C, Craig G (1987) *Aedes albopictus* in North  
568 America: probable introduction in used tires from northern Asia. *Science*, **236**,  
569 1114–1116.
- 570 Kambhampati S, Black WC, Rai KS (1991) Geographic origin of the US and Brazilian  
571 *Aedes albopictus* inferred from allozyme analysis. *Heredity*, **67 ( Pt 1)**, 85–93.

- 572 Lande R (2015) Evolution of phenotypic plasticity in colonizing species. *Molecular*  
573 *ecology*.
- 574 Li W, Godzik A (2006) Cd-hit: a fast program for clustering and comparing large sets of  
575 protein or nucleotide sequences. *Bioinformatics (Oxford, England)*, **22**, 1658–9.
- 576 Manni M, Gomulski LM, Aketarawong N *et al.* (2015) Molecular markers for analyses of  
577 intraspecific genetic diversity in the Asian Tiger mosquito, *Aedes albopictus*.  
578 *Parasites & vectors*, **8**, 188.
- 579 Marcondes CB, Ximenes M de FF de M (2015) Zika virus in Brazil and the danger of  
580 infestation by *Aedes (Stegomyia)* mosquitoes. *Revista da Sociedade Brasileira de*  
581 *Medicina Tropical*.
- 582 Martin M (2011) Cutadapt removes adapter sequences from high-throughput  
583 sequencing reads. *EMBnet.journal*, **17**, 10.
- 584 Miller MR, Dunham JP, Amores A, Cresko WA, Johnson EA (2007) Rapid and cost-  
585 effective polymorphism identification and genotyping using restriction site  
586 associated DNA (RAD) markers. *Genome research*, **17**, 240–8.
- 587 Minard G, Tran F-H, Tran-van V *et al.* (2015) French invasive Asian tiger mosquito  
588 populations harbor reduced bacterial microbiota and genetic diversity compared to  
589 Vietnamese autochthonous relatives. *Frontiers in Microbiology*, **6**.
- 590 Modolo L, Lerat E (2015) UrQt: an efficient software for the Unsupervised Quality  
591 trimming of NGS data. *BMC Bioinformatics*, **16**, 137.
- 592 Monden Y, Yamamoto A, Shindo A, Tahara M (2014) Efficient DNA fingerprinting based  
593 on the targeted sequencing of active retrotransposon insertion sites using a bench-  
594 top high-throughput sequencing platform. *DNA research : an international journal for*  
595 *rapid publication of reports on genes and genomes*, **21**, 491–8.
- 596 Munroe DJ, Haas M, Bric E *et al.* (1994) IRE-bubble PCR: a rapid method for efficient  
597 and representative amplification of human genomic DNA sequences from complex  
598 sources. *Genomics*, **19**, 506–14.
- 599 Paupy C, Delatte H, Bagny L, Corbel V, Fontenille D (2009) *Aedes albopictus*, an  
600 arbovirus vector: from the darkness to the light. *Microbes and infection / Institut*  
601 *Pasteur*, **11**, 1177–85.
- 602 Peischl S, Excoffier L (2015) Expansion load: recessive mutations and the role of  
603 standing genetic variation. *Molecular ecology*.
- 604 Poelchau MF, Reynolds J a., Denlinger DL, Elsik CG, Armbruster P a. (2013a)  
605 Transcriptome sequencing as a platform to elucidate molecular components of the  
606 diapause response in the Asian tiger mosquito, *Aedes albopictus*. *Physiological*  
607 *entomology*, **38**, 173–181.

- 608 Poelchau MF, Reynolds J a, Elsik CG, Denlinger DL, Armbruster P a (2013b) Deep  
609 sequencing reveals complex mechanisms of diapause preparation in the invasive  
610 mosquito, *Aedes albopictus*. *Proceedings. Biological sciences / The Royal Society*,  
611 **280**, 20130143.
- 612 Porretta D, Mastrantonio V, Bellini R, Somboon P, Urbanelli S (2012) Glacial history of a  
613 modern invader: phylogeography and species distribution modelling of the Asian  
614 tiger mosquito *Aedes albopictus*. *PloS one*, **7**, e44515.
- 615 Roy AM, Carroll ML, Kass DH *et al.* (1999) Recently integrated human Alu repeats:  
616 finding needles in the haystack. *Genetica*, **107**, 149–161.
- 617 Santolamazza F, Mancini E, Simard F *et al.* (2008) Insertion polymorphisms of SINE200  
618 retrotransposons within speciation islands of *Anopheles gambiae* molecular forms.  
619 *Malaria journal*, **7**, 163.
- 620 Stapley J, Santure AW, Dennis SR (2015) Transposable elements as agents of rapid  
621 adaptation may explain the genetic paradox of invasive species. *Molecular ecology*,  
622 **24**, 2241–52.
- 623 Takumi K, Scholte E-J, Braks M *et al.* (2009) Introduction, scenarios for establishment  
624 and seasonal activity of *Aedes albopictus* in The Netherlands. *Vector borne and*  
625 *zoonotic diseases (Larchmont, N. Y.)*, **9**, 191–6.
- 626 Urbanelli S, Bellini R, Carrieri M, Sallicandro P, Celli G (2000) Population structure of  
627 *Aedes albopictus* (Skuse): the mosquito which is colonizing Mediterranean  
628 countries. *Heredity*, **84 ( Pt 3)**, 331–337.
- 629 Urbanski JM, Benoit JB, Michaud MR, Denlinger DL, Armbruster P (2010) The  
630 molecular physiology of increased egg desiccation resistance during diapause in  
631 the invasive mosquito, *Aedes albopictus*. *Proceedings. Biological sciences / The*  
632 *Royal Society*, **277**, 2683–92.
- 633 Urbanski J, Mogi M, O'Donnell D *et al.* (2012) Rapid adaptive evolution of photoperiodic  
634 response during invasion and range expansion across a climatic gradient. *The*  
635 *American naturalist*, **179**, 490–500.
- 636 Zhong D, Lo E, Hu R *et al.* (2013) Genetic analysis of invasive *Aedes albopictus*  
637 populations in Los Angeles County, California and its potential public health impact.  
638 *PloS one*, **8**, e68586.

639

## 640 **Data Accessibility**

641 Paired-end raw sequences are available through SRA at NCBI under SRP070185

642 (Bioproject PRJNA312147)

643 Final presence/absence matrices (including replicates) are available at Dryad

644 (doi:10.5061/dryad.9p925) at <http://datadryad.org/review?doi=doi:10.5061/dryad.9p925>

## 645 **Author contributions**

646 CG, CV and MB conceived the experiments and conducted the analyses. CG and HH  
647 developed and performed the molecular experiments. GM, CVM and PM conducted the  
648 sampling in France and Vietnam. All authors contributed to the final version of the  
649 manuscript.

650 **Tables and Figures**

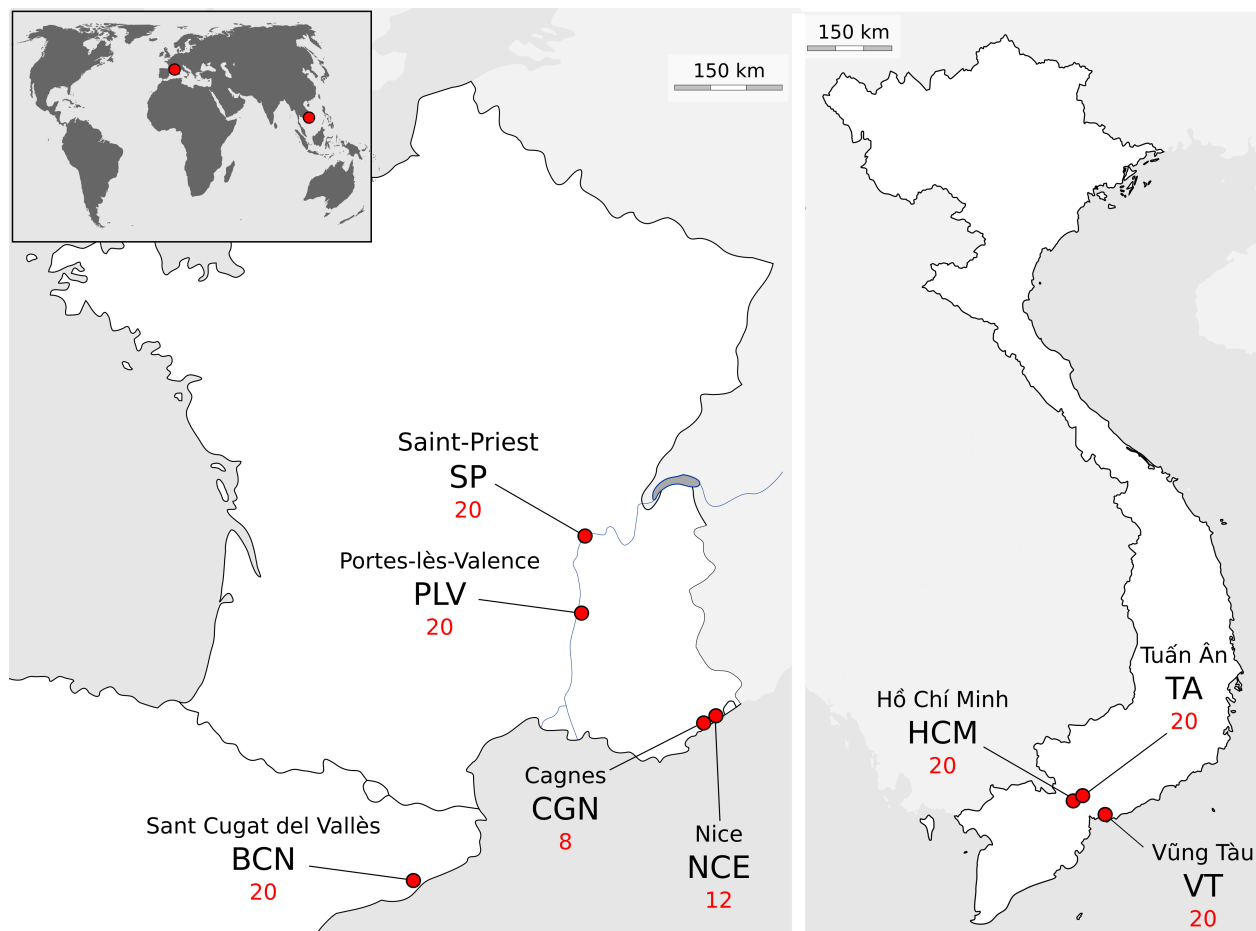

652 **Figure 1.** Sampling sites (with abbreviations) of *Ae. albopictus* in Europe and Vietnam.  
653 Red numbers correspond to the total number of individual sampled. Supporting  
654 information about samples are available in Table S1.



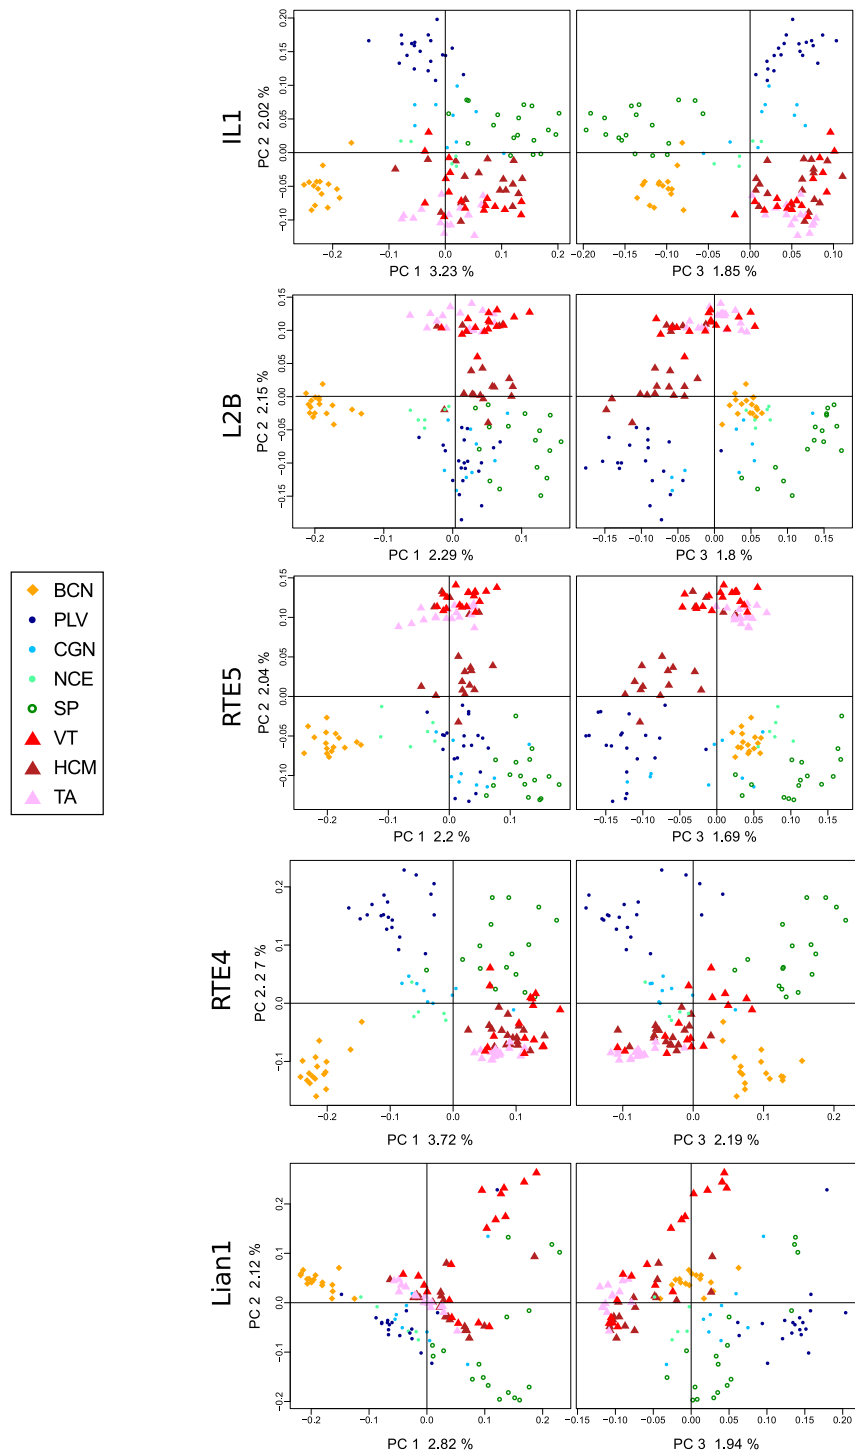

655

656 **Figure 2. Principal Coordinate Analyses (PCoAs).** Projection of individuals over the  
657 three first principal coordinates (PC) of PCoAs for each of the 5 TE families and for the  
658 first replicate (M1, see Material and Methods). Proportion of inertia represented by each  
659 axes is noted in %. circles: European populations; triangles: Vietnamese populations.  
660 Results for other sampling replicate can be found in Figure S4.



661 **Table 1. Analyses of Molecular Variance (AMOVAs).** Results for the three replicates  
662 (M1, M2, M3) of read sampling for the five TE families (IL1, L2B, RTE5, RTE4, Lian1).  
663 Values are given in percentage of the total genetic variance

|                    | IL1           | L2B           | RTE5          | RTE4          | Lian1         |
|--------------------|---------------|---------------|---------------|---------------|---------------|
| Among groups       | [0.59-0.70]   | [1.22-1.29]   | [1.08-1.10]   | [1.97-2.04]   | [0.67-0.74]   |
| Among populations  |               |               |               |               |               |
| within groups      | [5.15-5.37]   | [3.58-3.63]   | [3.36-3.40]   | [6.67-6.78]   | [4.47-4.56]   |
| Within populations | [94.04-94.16] | [95.08-95.18] | [95.51-95.55] | [91.18-91.30] | [94.77-94.81] |

intervals reports min and max values among the 3 sampling replicates

664

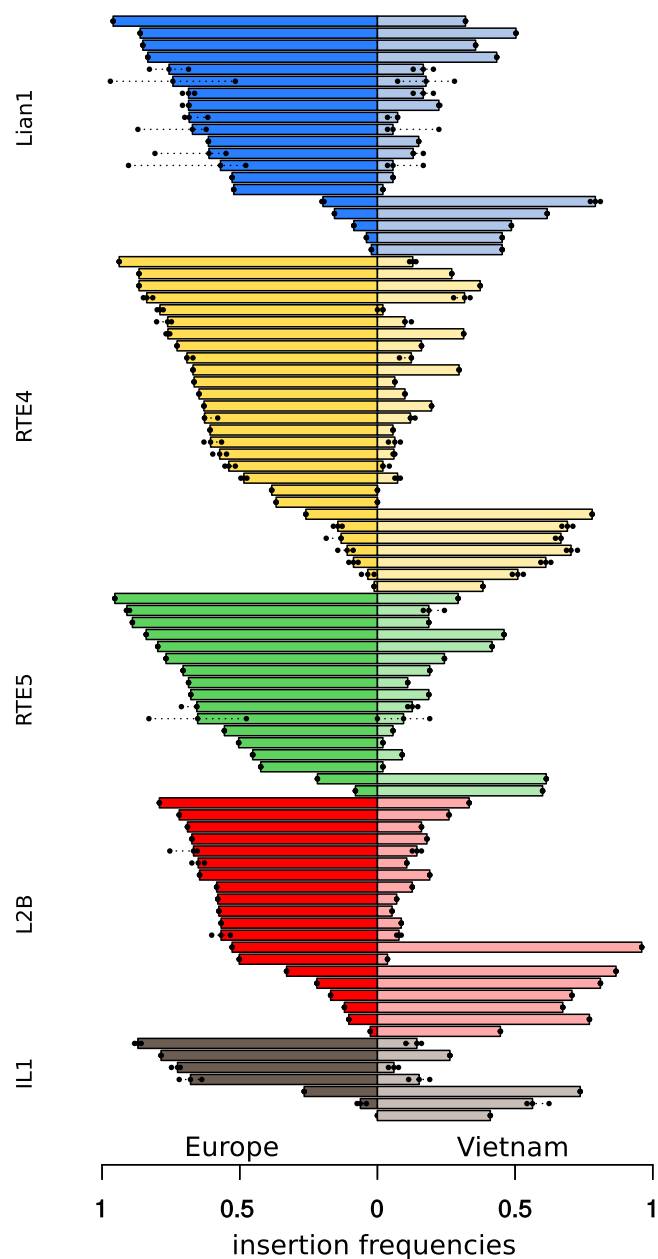

665

666 **Figure 3. Insertion frequencies in Europe and Vietnam for the 92 outlier loci.** Bars  
667 represent the median value from the three reads sampling replicates and dots the  
668 values from the other replicates (if outlier found in replicate). Colors correspond to each  
669 of the 5 TE families.

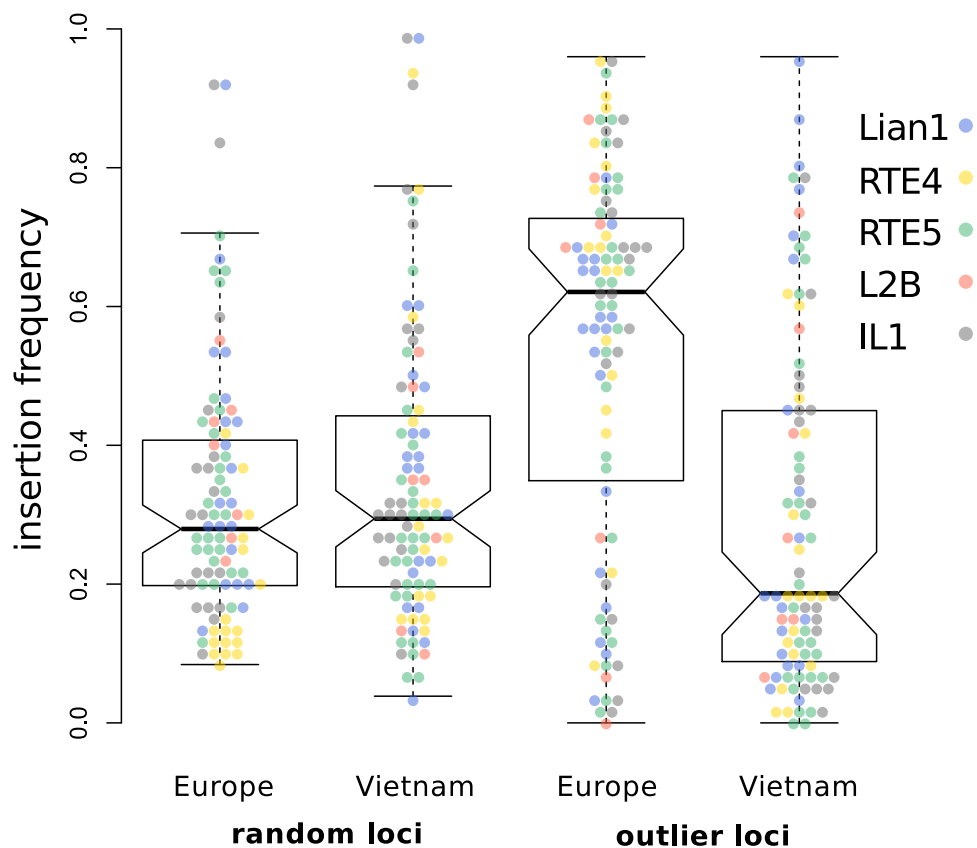

670

671 **Figure 4. Comparison of outliers frequencies with randomly selected loci.** Insertion  
672 frequencies of 92 randomly chosen loci among those having the same minimum  
673 insertion frequency ( $\geq 20$  individuals) as outliers compared to the 92 outlier loci. Random  
674 loci were taken from the first replicate (M1) and values for outliers are median values  
675 obtained among the three replicates. Non-overlapping notches indicate a significant  
676 difference between the true medians (thick dark horizontal bars).
